# Supplementary material for: What drives the precipitation of long-chain calcium carboxylates (soaps) in aqueous solution?
Source: Royal Society of Chemistry journal article supplement (doi:10.1039/c2cp24152h), 2012-01-01
Supplement: c2cp24152h.pdf [file c2cp24152h.pdf]

## SUPPORTING INFORMATION

### What drives the precipitation of long-chain calcium carboxylates (soaps) in aqueous solution?

Rui F.P. Pereira, Artur J.M. Valente, Mariana Fernandes and Hugh D. Burrows

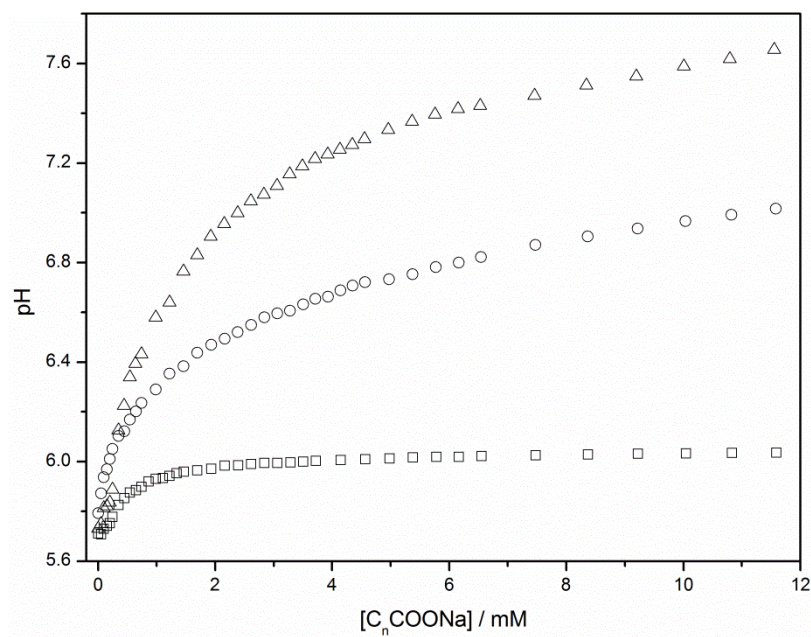

**Figure I.** Dependence of pH on the concentration of sodium octanoate (□), sodium decanoate (○) and sodium dodecanoate (Δ) in aqueous solution, at 25 °C.

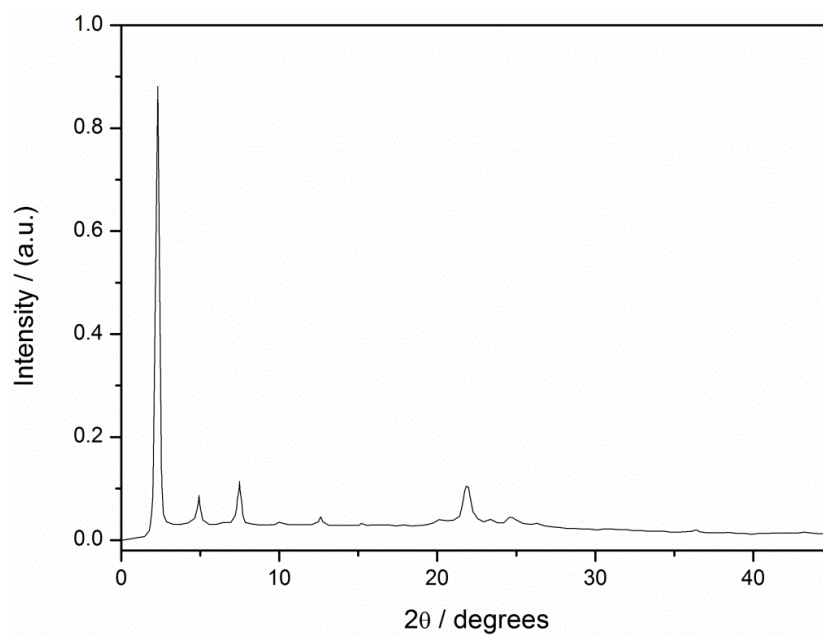

**Figure II.** Representative X-ray diffractogram for calcium dodecanoate.

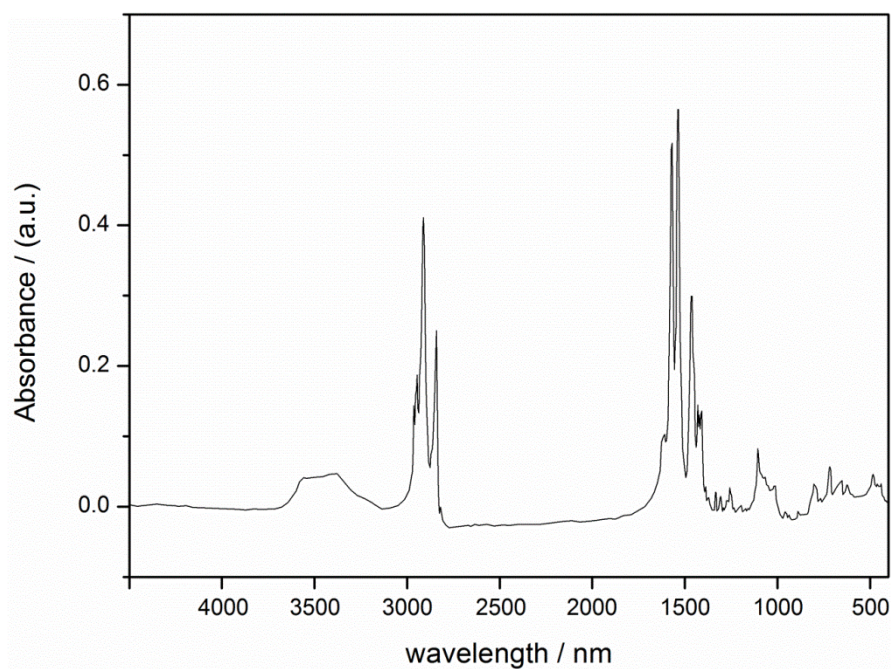

**Figure III.** Representative FTIR spectrum for calcium decanoate.
